# Supplementary material
Source: Royal Society of Chemistry journal article supplement (doi:10.1039/d6lc00331a)
Supplement: d6lc00331a1.pdf [file d6lc00331a1.pdf]

## Supporting Information

# A real-time microfluidic surveillance system for multiplex detection of heavy metal contamination in wastewater

Ping Dong<sup>#a</sup>, Yanfeng Gao<sup>#b</sup>, Wenjian Zhao<sup>c</sup>, Lingtao Fan<sup>a</sup>, Yuzhen Wang<sup>\*a</sup>

*<sup>a</sup>Key Laboratory of Flexible Electronics (KLOFE), Institute of Advanced Materials (IAM) & School of Flexible Electronics (Future Technologies), Nanjing Tech University, Nanjing 211816, China*

*<sup>b</sup>School of Medical Imaging, Wannan Medical University, Wuhu 241002, China*

*<sup>c</sup>College of Engineering and Applied Sciences, State Key Laboratory of Analytical Chemistry for Life Science, Nanjing University, Nanjing 210023, China*

### Experimental

#### 1. Materials and chemicals

Lab Cas12a (Cpf1) and NEB 2.1 buffer were purchased from New England Biolabs Inc. (Ipswich, USA). Ultrapure water was purified through a Milli-Q system (Millipore, Synergy). 1,4-Benzenedicarboxylic acid, Zirconium Oxychloride Octahydrate ( $\text{ZrOCl}_2 \cdot 8\text{H}_2\text{O}$ ), (3-aminopropyl) triethoxysilane (APTES), acetic acid and PEG were purchased from Aladdin (Shanghai, China). N,N-dimethylformamide (DMF),  $\text{FeCl}_3 \cdot 6\text{H}_2\text{O}$ , ethylene glycol, tetraethyl orthosilicate (TEOS), glutaraldehyde were purchased Macklin (Shanghai, China). Methanol, ethanol, concentrated ammonia aqueous solution and other inorganic salt reagents were obtained from HUSHI (Shanghai, China).

## Supporting Figures

Table S1. Method Comparison Table<sup>1-10</sup>

| Number | Sensing method                                                   | Target ions                                                  | LOD (nM)                                                                      | Linear range (nM) | Multiplex detection |
|--------|------------------------------------------------------------------|--------------------------------------------------------------|-------------------------------------------------------------------------------|-------------------|---------------------|
| 1      | Cu <sup>2+</sup> /S2T3 <sub>AT</sub> -                           | Cu <sup>2+</sup>                                             | 300                                                                           | 300-300000        | No                  |
| 2      | N-CDs                                                            | Hg <sup>2+</sup>                                             | 989                                                                           | 2000-10000        | Yes                 |
| 3      | Fe <sub>3</sub> O <sub>4</sub> @SiO <sub>2</sub> @SulfHydryl SPC | Hg <sup>2+</sup>                                             | 4.985                                                                         | 4.985-24926       | No                  |
| 4      | MnCo <sub>2</sub> O <sub>4</sub> /PAA-g-jute                     | Pb <sup>2+</sup>                                             | 3.65                                                                          | 4-1448            | No                  |
| 5      | PVDF/SiO <sub>2</sub> -g-CDs                                     | Hg <sup>2+</sup>                                             | 1.6                                                                           | 1.5-20000         | No                  |
| 6      | CD-PCH                                                           | Cu <sup>2+</sup> ,<br>Pb <sup>2+</sup>                       | 10000                                                                         | 10000-1000000     | Yes                 |
| 7      | Nafion-blanketing                                                | Pb <sup>2+</sup>                                             | 0.178                                                                         | 10-50             | Yes                 |
| 8      | AuNP colorimetic smartphone sensing                              | Cu <sup>2+</sup> ,<br>Pb <sup>2+</sup> ,<br>Hg <sup>2+</sup> | Cu <sup>2+</sup> : 2.0<br>Pb <sup>2+</sup> : 1.0<br>Hg <sup>2+</sup> : 0.5    | 1-50              | No                  |
| 9      | Bismuth film modified stripping voltammetre                      | Cu <sup>2+</sup> ,<br>Pb <sup>2+</sup> ,<br>Hg <sup>2+</sup> | Cu <sup>2+</sup> : 2720<br>Pb <sup>2+</sup> : 2320<br>Hg <sup>2+</sup> : 1200 | 1500-110000       | Yes                 |
| 10     | Thiacalixarene-based MOF electrochemical sensor                  | Cu <sup>2+</sup> ,<br>Pb <sup>2+</sup> ,<br>Hg <sup>2+</sup> | Cu <sup>2+</sup> : 0.12<br>Pb <sup>2+</sup> : 0.28<br>Hg <sup>2+</sup> : 0.35 | 0.5-200           | Yes                 |

|    |             |                                                              |                                                                               |         |     |
|----|-------------|--------------------------------------------------------------|-------------------------------------------------------------------------------|---------|-----|
| 11 | Bio-barcode | Cu <sup>2+</sup> ,<br>Pb <sup>2+</sup> ,<br>Hg <sup>2+</sup> | Cu <sup>2+</sup> : 0.26<br>Pb <sup>2+</sup> : 0.06<br>Hg <sup>2+</sup> : 0.80 | 0.1-1.0 | Yes |
|----|-------------|--------------------------------------------------------------|-------------------------------------------------------------------------------|---------|-----|

## Reference

1. T. T. Guo, X. Y. Cao, Y. Y. An, X. L. Zhang and J. Z. Yan, *Inorg Chem*, 2023, 62, 4485-4494.
2. K. Madhivanan, R. Atchudan, S. Arya and A. K. Sundramoorthy, *Nanoscale Adv*, 2025, 7, 3432-3448.
3. L.-Y. Zhao, L. Han, J. Lin, G.-P. Li, H.-Y. Shen, Y.-W. Wu, X.-L. Guo, L.-L. Zhang and Y.-T. Li, *ACS Applied Electronic Materials*, 2024, 6, 6554-6560.
4. M. Kim, J. Park, H. Park, W. Jo, W. Lee and J. Park, *ACS Sustainable Chemistry & Engineering*, 2023, 11, 6844-6855.
5. J. Ren, J. Li, J. Li, H. Liu and Y. Luo, *Materials Today Chemistry*, 2025, 50.
6. J. Li, Z. Ji, H. Sun, D. Zhang, Y. Zhao and L. Chen, *Environ Technol*, 2022, 43, 1648-1661.
7. N. M. Yousif, H. M. AbdelRasool, M. R. Balboul and R. M. Attia, *Sensors and Actuators A: Physical*, 2026, 406.
8. Z. Dai, Z. Gu, Y. Yang, L. Yao, M. Li, Y. Pu, Y. Ying and X. Hong, *Materials Today Chemistry*, 2023, 34.
9. C. Ma, J. Liu, X. Zhong, J. Liu and X. Jiang, *Fuel*, 2024, 372.
10. Y. Mou, Y. Zhang, X. Lin, M. Chen, Y. Xia, S. Zhu, C. Wei and X. Luo, *Anal Methods*, 2023, 15, 3466-3475.
